# Supplementary material
Source: publisher site journal article supplement (https://www.dovepress.com/article/206747)
Supplement: Supplementary file 1 [file get_supplementary_file.php]

## Search Strategies

---

### Databases' search strategy

---

#### MEDLINE

Database: Ovid MEDLINE(R) Epub Ahead of Print, In-Process & Other Non-Indexed Citations, Ovid MEDLINE(R) Daily and Ovid MEDLINE(R) <1946 to Present>  
Search Strategy:

- 
- 1 Ventricular Function, Left/ (32622)
  - 2 Ventricular Dysfunction, Left/ (24705)
  - 3 left ventric\*.mp. (179585)
  - 4 LV.mp. (41504)
  - 5 1 or 2 or 3 or 4 (198982)
  - 6 Echocardiography/ (78179)
  - 7 speckle tracking.mp. (3722)
  - 8 STE.mp. (1905)
  - 9 strain.mp. (385200)
  - 10 deformation.mp. (36853)
  - 11 mechanic\*.mp. (390628)
  - 12 torsion.mp. (22257)
  - 13 twist.mp. (10298)
  - 14 rotation.mp. (95760)
  - 15 GLS.mp. (1508)
  - 16 6 or 7 or 8 or 9 or 10 or 11 or 12 or 13 or 14 or 15 (963614)
  - 17 Cardiovascular Diseases/ (128863)
  - 18 cardiovascular disease\*.mp. (220948)
  - 19 Heart Failure/ (103286)
  - 20 Heart failure.mp. (176882)
  - 21 HF.mp. (35998)
  - 22 Mortality/ (39168)
  - 23 mortality.mp. (670200)
  - 24 Death/ (16230)
  - 25 death.mp. (691814)
  - 26 Morbidity/ (27417)
  - 27 morbidity.mp. (330859)
  - 28 (cardi\* adj3 (event\* or outcome\*)).mp. (66991)
  - 29 17 or 18 or 19 or 20 or 21 or 22 or 23 or 24 or 25 or 26 or 27 or 28 (1690357)
  - 30 predict\*.mp. (1382430)
  - 31 prognos\*.mp. (734497)
-

|               |                                                                                                                                                                                                                                                                                                                                                                                                                                                                                                                                                                                                                                                                                                                                                                                                                                                                                                                                                                                      |
|---------------|--------------------------------------------------------------------------------------------------------------------------------------------------------------------------------------------------------------------------------------------------------------------------------------------------------------------------------------------------------------------------------------------------------------------------------------------------------------------------------------------------------------------------------------------------------------------------------------------------------------------------------------------------------------------------------------------------------------------------------------------------------------------------------------------------------------------------------------------------------------------------------------------------------------------------------------------------------------------------------------|
|               | <p>32 30 or 31 (1934125)</p> <p>33 exp Cohort Studies/ (1714168)</p> <p>34 (cohort adj (study or studies)).mp. (310492)</p> <p>35 (Follow up adj (study or studies)).mp. (604740)</p> <p>36 Longitudinal.mp. (250750)</p> <p>37 (observational adj (study or studies)).mp. (109821)</p> <p>38 Epidemiologic studies/ (7611)</p> <p>39 (epidemiologic* adj (study or studies)).mp. (79971)</p> <p>40 population based study.mp. (24755)</p> <p>41 general population.mp. (85498)</p> <p>42 communit*.mp. (535197)</p> <p>43 33 or 34 or 35 or 36 or 37 or 38 or 39 or 40 or 41 or 42 (2539317)</p> <p>44 5 and 16 and 29 and 32 and 43 (2940)</p>                                                                                                                                                                                                                                                                                                                                     |
| <b>EMBASE</b> | <p>Database: Embase Classic+Embase &lt;1947 to 2018 February 27&gt;</p> <p>Search Strategy:</p> <p>-----</p> <p>1 heart left ventricle function/ (39176)</p> <p>2 left ventric*.mp. (332499)</p> <p>3 LV.mp. (83461)</p> <p>4 1 or 2 or 3 (353062)</p> <p>5 echocardiography/ (178295)</p> <p>6 exp speckle tracking echocardiography/ (3150)</p> <p>7 speckle tracking.mp. (10536)</p> <p>8 STE.mp. (4416)</p> <p>9 strain.mp. (762166)</p> <p>10 deformation.mp. (42935)</p> <p>11 mechanic*.mp. (498347)</p> <p>12 torsion.mp. (27446)</p> <p>13 twist.mp. (12502)</p> <p>14 rotation.mp. (109923)</p> <p>15 GLS.mp. (3938)</p> <p>16 5 or 6 or 7 or 8 or 9 or 10 or 11 or 12 or 13 or 14 or 15 (1553350)</p> <p>17 cardiovascular disease/ (241943)</p> <p>18 cardiovascular disease*.mp. (336057)</p> <p>19 heart failure/ (212076)</p> <p>20 Heart Failure.mp. (347509)</p> <p>21 HF.mp. (60866)</p> <p>22 mortality/ (722163)</p> <p>23 cardiovascular mortality/ (29486)</p> |

---

|    |                                                                                               |
|----|-----------------------------------------------------------------------------------------------|
| 24 | all cause mortality/ (4807)                                                                   |
| 25 | mortality.mp. (1271143)                                                                       |
| 26 | death/ (284488)                                                                               |
| 27 | death.mp. (1097060)                                                                           |
| 28 | morbidity/ (309365)                                                                           |
| 29 | morbidity.mp. (569914)                                                                        |
| 30 | (cardi* adj3 (event* or outcome*)).mp. (110928)                                               |
| 31 | 17 or 18 or 19 or 20 or 21 or 22 or 23 or 24 or 25 or 26 or 27 or 28 or 29 or 30<br>(2824491) |
| 32 | predict*.mp. (1798936)                                                                        |
| 33 | prognos*.mp. (982782)                                                                         |
| 34 | 32 or 33 (2544622)                                                                            |
| 35 | longitudinal study/ (109328)                                                                  |
| 36 | longitudinal.mp. (297876)                                                                     |
| 37 | prospective study/ (426930)                                                                   |
| 38 | cohort analysis/ (346132)                                                                     |
| 39 | (Cohort adj (study or studies)).mp. (217636)                                                  |
| 40 | (follow up adj (study or studies)).mp. (63815)                                                |
| 41 | (observational adj (study or studies)).mp. (172984)                                           |
| 42 | (epidemiologic* adj (study or studies)).mp. (100634)                                          |
| 43 | population based study.mp. (33254)                                                            |
| 44 | general population.mp. (124629)                                                               |
| 45 | communit*.mp. (641283)                                                                        |
| 46 | 35 or 36 or 37 or 38 or 39 or 40 or 41 or 42 or 43 or 44 or 45 (1963334)                      |
| 47 | 4 and 16 and 31 and 34 and 46 (4098)                                                          |

---

'adj3' is a proximity operator and indicates within three words;

'OR and AND' are Boolean operators;

'\*' indicates truncation;

'mp.' means a keyword search of title, abstract, original title, name of substance word, subject heading word and keyword heading word.

**Supplemental Table 1. Studies reporting Kaplan-Meier data as descriptive information**

| <b>Citation<br/>(Author,<br/>year)</b> | <b>Categories</b>                                                                                                                                                                                                                                                                                       | <b>P value</b>                                           | <b>Outcomes</b>                                                                                                                                                                                                                                                                                                                                                                              | <b>Participants</b> |
|----------------------------------------|---------------------------------------------------------------------------------------------------------------------------------------------------------------------------------------------------------------------------------------------------------------------------------------------------------|----------------------------------------------------------|----------------------------------------------------------------------------------------------------------------------------------------------------------------------------------------------------------------------------------------------------------------------------------------------------------------------------------------------------------------------------------------------|---------------------|
| Russo et al<br>(2014)                  | Event-free probability in participants with any LVSD (GLS LVSD or LVEF LVSD) vs. no LVSD<br><br>Event-free probability in participants with LVEF-LVSD, GLS-LVSD and no LVSD                                                                                                                             | <0.001, log-rank p<br><br><0.001, log-rank p             | <b>Composite CV end point</b><br><br>n=58<br><br>(included ischemic stroke [n=16], myocardial infarction [n=10], and vascular death [n=32])                                                                                                                                                                                                                                                  | All                 |
| Russo et al<br>(2015)                  | Cumulative incidence in participants with GLS>-14.7% vs. GLS≤-14.7%<br><br>Cumulative incidence in participants with:<br><br>Group 1: Normal GLS/normal LAVi<br><br>Group 2: Abnormal GLS/normal LAVi<br><br>Group 3: Normal GLS/abnormal LAVi<br><br>Group 4: Abnormal GLS/abnormal LAVi               | <0.001, p for comparison<br><br><0.001, p for comparison | <b>Atrial fibrillation (AF)</b>                                                                                                                                                                                                                                                                                                                                                              | All                 |
| Kuznetsova et al<br>(2016)             | Cumulative incidence according to the quartiles of mid-wall strain:<br><br>Low, low-medium, medium-high and high LV mid-wall strain quartile<br><br>Cumulative incidence according to the groups with 0, 1, 2, 3 LV abnormalities in echocardiography including abnormal mid-wall strain, LVH and LVDD) | <0.0001, p for trend<br><br><0.0001, log-rank p          | <b>Composite CV end point</b><br><br>n=96<br><br>(comprised cardiac end points, stroke, transient ischemic attack, aortic aneurysm, arterial embolism, and revascularization of peripheral arteries)<br><br><b>Composite cardiac end point</b><br><br>n=68<br><br>(Included coronary events, fatal and nonfatal HF, pulmonary heart disease, new-onset AF, and life-threatening arrhythmias) | All                 |
| Biering-Sorensen et al<br>(2017)       | Cumulative incidence stratified by quartiles of GLS (quartile 1, 2, 3 and 4)                                                                                                                                                                                                                            | <0.001, Log rank p<br><br><0.001, Log rank p             | <b>Composite cardiac end point</b><br><br>n=149<br><br>(comprising AMI [n=43], HF [n=78], and CV death [n=74])<br><br><b>HF: n = 78</b>                                                                                                                                                                                                                                                      | All                 |

|                                                                                                                                                                                                                                                                                                                                    |                                                                                                                        |                    |                                                                                                                            |                               |
|------------------------------------------------------------------------------------------------------------------------------------------------------------------------------------------------------------------------------------------------------------------------------------------------------------------------------------|------------------------------------------------------------------------------------------------------------------------|--------------------|----------------------------------------------------------------------------------------------------------------------------|-------------------------------|
|                                                                                                                                                                                                                                                                                                                                    |                                                                                                                        | 0.016, Log rank p  | <b>AMI: n = 43</b>                                                                                                         |                               |
|                                                                                                                                                                                                                                                                                                                                    |                                                                                                                        | 0.15, Log rank p   | <b>CV death: n= 74</b>                                                                                                     |                               |
|                                                                                                                                                                                                                                                                                                                                    | Cumulative incidence stratified by quartiles of GLS (quartile 1, 2, 3 and 4)                                           | 0.12, Log rank p   | <b>Composite cardiac end point</b><br><b>n=77</b><br>(comprising AMI, HF, and CV death)                                    | Female                        |
|                                                                                                                                                                                                                                                                                                                                    |                                                                                                                        | 0.09, Log rank p   | <b>HF</b>                                                                                                                  |                               |
|                                                                                                                                                                                                                                                                                                                                    |                                                                                                                        | 0.28, Log rank p   | <b>AMI</b>                                                                                                                 |                               |
|                                                                                                                                                                                                                                                                                                                                    |                                                                                                                        | 0.37, Log rank p   | <b>CV death</b>                                                                                                            |                               |
|                                                                                                                                                                                                                                                                                                                                    | Cumulative incidence stratified by quartiles of GLS (quartile 1, 2, 3 and 4)                                           | <0.001, Log rank p | <b>Composite cardiac end point</b><br><b>n=72</b><br>(comprising AMI], HF, and CV death)                                   | Male                          |
|                                                                                                                                                                                                                                                                                                                                    |                                                                                                                        | <0.001, Log rank p | <b>HF</b>                                                                                                                  |                               |
|                                                                                                                                                                                                                                                                                                                                    |                                                                                                                        | 0.030, Log rank p  | <b>AMI</b>                                                                                                                 |                               |
|                                                                                                                                                                                                                                                                                                                                    |                                                                                                                        | 0.22, Log rank p   | <b>CV death</b>                                                                                                            |                               |
| Brainin et al (2018)                                                                                                                                                                                                                                                                                                               | Cumulative incidence stratified by number of walls displaying post systolic shortening (no wall, 1 wall, and ≥2 walls) | <0.001, Log rank p | <b>Composite cardiac end point</b><br><b>n=149 (11.5%)</b><br><br>(composite of HF [n=78], MI [n=43], and CV death [n=74]) | All                           |
|                                                                                                                                                                                                                                                                                                                                    |                                                                                                                        | <0.001, Log rank p | <b>Deaths</b><br><br>n=236 (18.1%)                                                                                         |                               |
| Modin et al (2018)                                                                                                                                                                                                                                                                                                                 | Cumulative incidence stratified by median GLS in hypertensive individuals: lower vs upper half                         | P=0.016            | <b>Composite cardiac end point</b><br><br>(Composite of either IHD or HF)<br><br>n=145 (65%) in hypertensive               | Hypertensive participants     |
|                                                                                                                                                                                                                                                                                                                                    | Cumulative incidence stratified by median GLS in non-hypertensive individuals: lower vs upper half                     | P<0.001            | and n=77 (35%) in non-hypertensive                                                                                         | Non-hypertensive participants |
| <b>Abbreviations:</b> AMI, acute myocardial infarction; CV, cardiovascular; HF, heart failure; IHD, ischemic heart disease; LAVi, left atrial volume index; LV, left ventricular; LVDD, LV diastolic dysfunction; LVEF, LV ejection fraction; LVH, LV hypertrophy; LVSD, LV systolic dysfunction; GLS, global longitudinal strain. |                                                                                                                        |                    |                                                                                                                            |                               |

## Maximally adjusted models of included studies

- **Russo et al (2014):** adjusted for age, sex, systolic blood pressure (SPB), diastolic BP, hypertension, anti-hypertensive medications, diabetes mellitus (DM), left ventricular mass index (LVMI), relative wall thickness, left atrial volume index, diastolic dysfunction, atrial fibrillation and LVEF.
- **Kuznetsova et al (2016):** adjusted for family clusters, sex, age, body mass index (BMI), SBP, serum cholesterol, smoking, antihypertensive treatment, DM, and a history of cardiac disease, TDI e' and LVMI.
- **Cheng et al (2015):** adjusted for age, sex, ethnicity, BMI, SBP, diastolic BP, anti-hypertensive treatment, total/ HDL cholesterol, DM, smoking status, left ventricular (LV) mass (LVM), LV fractional shortening, and heart rate (HR).
- **Biering-Sorensen et al (2017):** adjusted for age, sex, HR, hypertension, DM, previous ischemic heart disease, SBP, and pro-BNP (>150 pmol/L), LVEF (<50%), LVMI, LV dimension, deceleration time, left atrial dimension, and E/e'.



|                                                                                                                                                                                                                                                                                                                              |   |   |   |   |   |   |   |   |
|------------------------------------------------------------------------------------------------------------------------------------------------------------------------------------------------------------------------------------------------------------------------------------------------------------------------------|---|---|---|---|---|---|---|---|
| <b>2- Was follow-up long enough for outcomes to occur</b><br>a) yes (an adequate follow up period for outcome of interest is a year) *<br>b) no                                                                                                                                                                              | * | * | * | * | * | * | * | * |
| <b>3- Adequacy of follow up of cohorts</b><br>a) Complete follow up - all subjects accounted for *<br>b) Subjects lost to follow up unlikely to introduce bias - small number lost - > 80% follow up, or description provided of those lost *<br>c) Follow up rate < 80% and no description of those lost<br>d) No statement | * | * | * | * | * | * | * | * |
| <b>Total</b>                                                                                                                                                                                                                                                                                                                 |   |   |   |   |   |   |   |   |
| <b>Average of both reviewers</b>                                                                                                                                                                                                                                                                                             | 7 | 7 | 7 | 7 | 7 | 7 | 6 | 7 |



**Supplement Figure 1** Global longitudinal strain as a predictor of composite cardiovascular end-point on maximally adjusted models.

**A.**

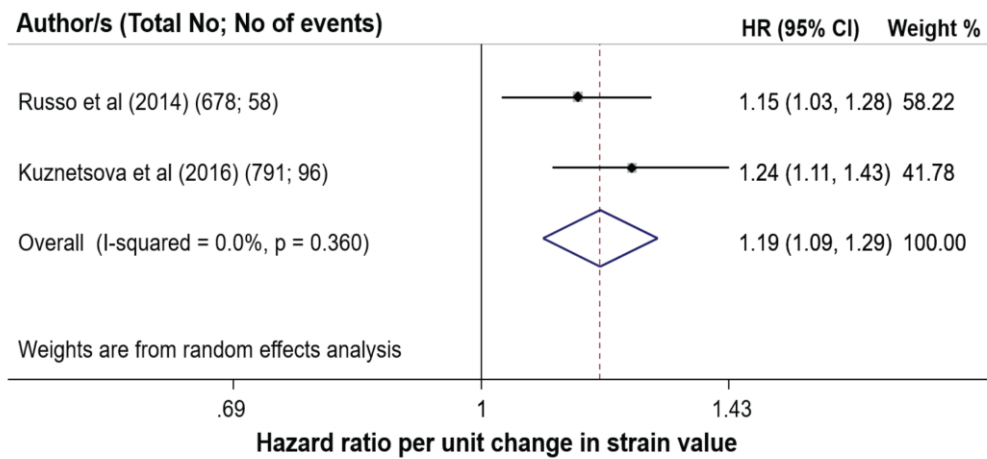

**B.**

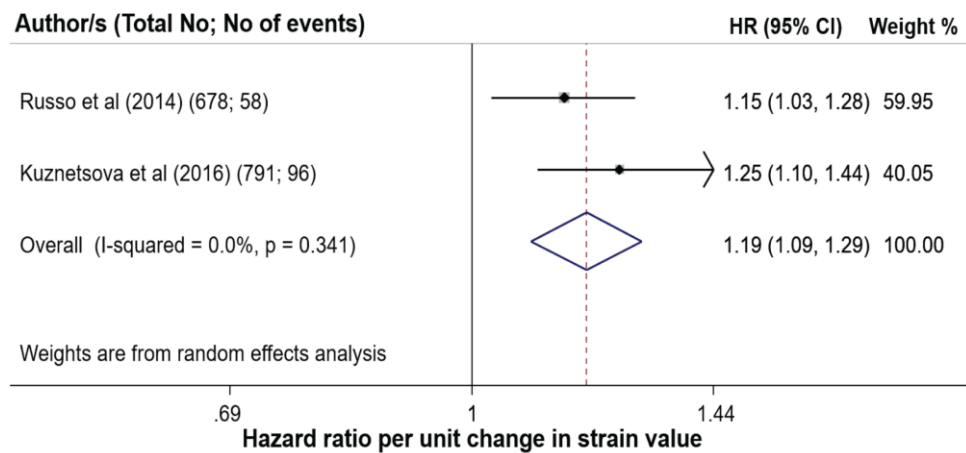

Sensitivity analysis of replacing the endocardial strain with **(A)** mid-wall and **(B)** epicardial strains for Kuznetsova et al (2016) study. HRs are per unit change in strain value. The heterogeneity assessment including the I<sup>2</sup> statistics and p-value of Q test are shown.

**Supplement Figure 2.** Global longitudinal strain as a predictor of composite cardiac-end point on minimally adjusted models

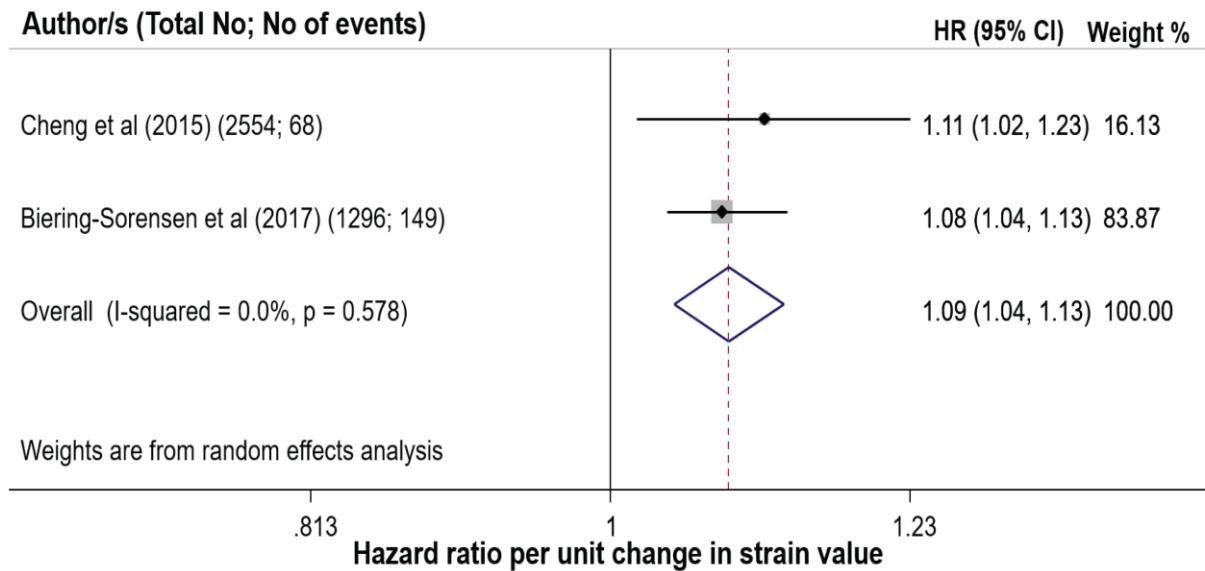

Cheng et al (2015) adjusted for age, sex and ethnicity and Biering-Sorensen et al (2017) adjusted for age and sex. HRs are per unit change in strain value. The heterogeneity assessment including the  $I^2$  statistics and p-value of Q test are shown.

**Supplement Figure 3.** Global longitudinal strain as a predictor of composite cardiac end-point on maximally adjusted models.

**A.**

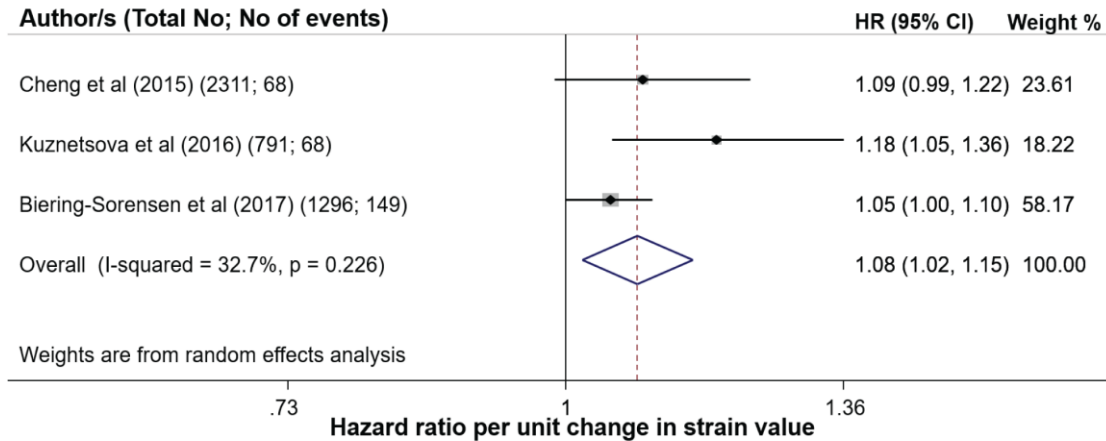

**B.**

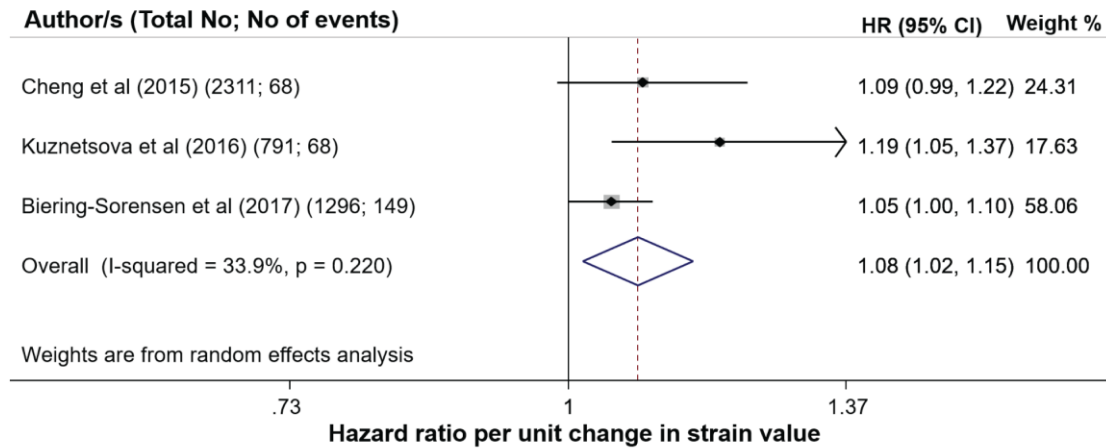

Sensitivity analysis of replacing the endocardial strain with (A) mid-wall and (B) epicardial strains for Kuznetsova et al (2016) study. HRs are per unit change in strain value. The heterogeneity assessment including the I<sup>2</sup> statistics and p-value of Q test are shown.

**Supplement Figure 4.** Global longitudinal strain as a predictor of (A) coronary artery disease and (heart failure) on minimally adjusted models.

**A. Coronary heart disease**

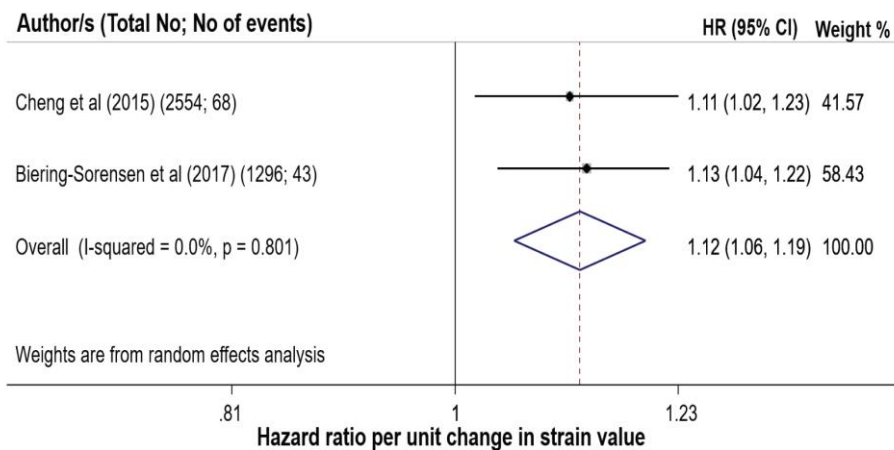

**B. Heart failure**

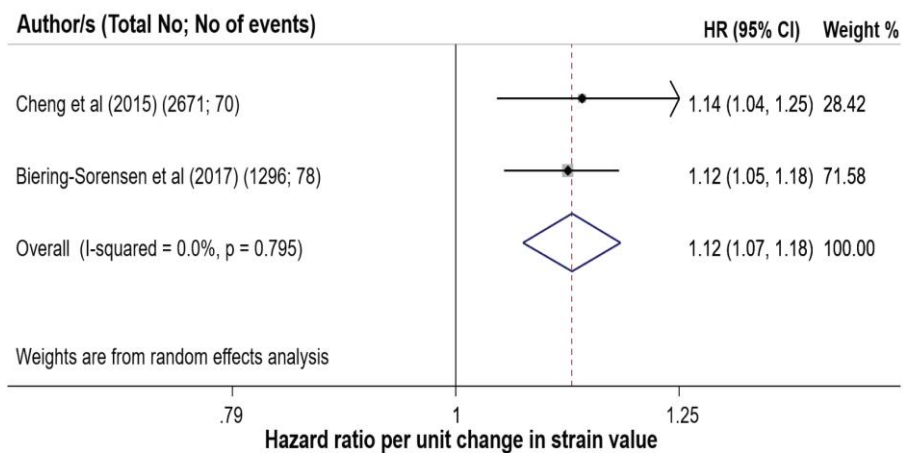

Cheng et al (2015) adjusted for age, sex and ethnicity and Biering-Sorensen et al (2017) adjusted for age and sex. HRs are per unit change in strain value. The heterogeneity assessment including the  $I^2$  statistics and p-value of Q test are shown.

**Supplement Figure 5.** Global longitudinal strain as a predictor of coronary heart disease on maximally adjusted models.

**A.**

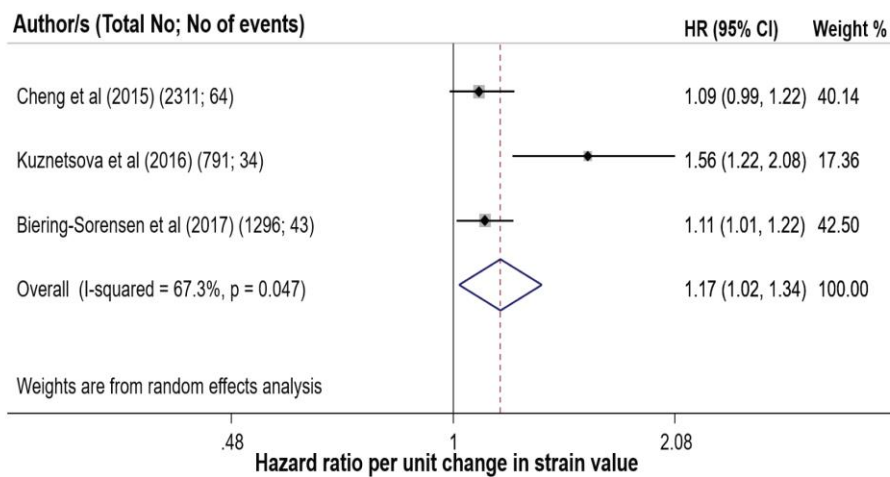

**B.**

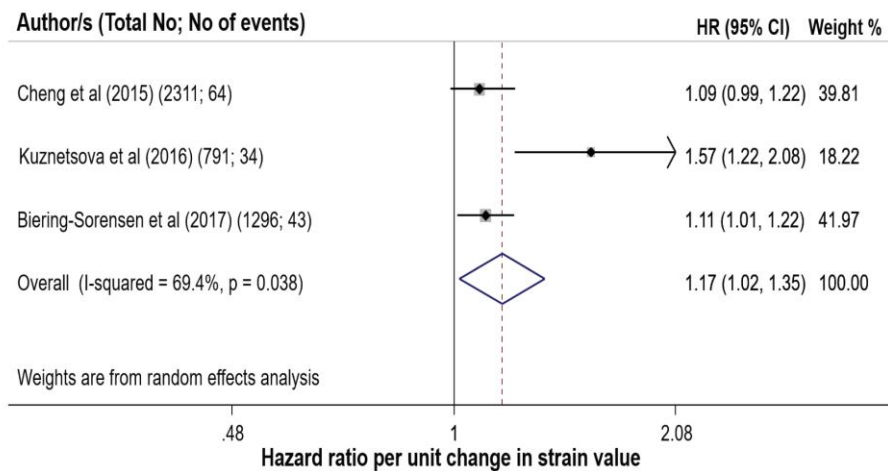

Sensitivity analysis of replacing the endocardial strain with **(A)** mid-wall and **(B)** epicardial strains for Kuznetsova et al (2016) study. HRs are per unit change in strain value. The heterogeneity assessment including the  $I^2$  statistics and p-value of Q test are shown.

## References

1. Russo C, Jin Z, Elkind MS, et al. Prevalence and prognostic value of subclinical left ventricular systolic dysfunction by global longitudinal strain in a community-based cohort. *Eur J Heart Fail.* 2014;16(12):1301-1309.
2. Cheng S, McCabe EL, Larson MG, et al. Distinct Aspects of Left Ventricular Mechanical Function Are Differentially Associated With Cardiovascular Outcomes and All-Cause Mortality in the Community. *J Am Heart Assoc.* 2015;4(10):e002071.
3. Russo C, Jin Z, Sera F, et al. Left Ventricular Systolic Dysfunction by Longitudinal Strain Is an Independent Predictor of Incident Atrial Fibrillation: A Community-Based Cohort Study. *Circ Cardiovasc Imaging.* 2015;8(8):e003520.
4. Kuznetsova T, Cauwenberghs N, Knez J, et al. Additive Prognostic Value of Left Ventricular Systolic Dysfunction in a Population-Based Cohort. *Circ Cardiovasc Imaging.* 2016;9(7).
5. Biering-Sorensen T, Biering-Sorensen SR, Olsen FJ, et al. Global Longitudinal Strain by Echocardiography Predicts Long-Term Risk of Cardiovascular Morbidity and Mortality in a Low-Risk General Population: The Copenhagen City Heart Study. *Circ Cardiovasc Imaging.* 2017;10(3).
6. Brainin P, Biering-Sorensen SR, Mogelvang R, Sogaard P, Jensen JS, Biering-Sorensen T. Postsystolic Shortening by Speckle Tracking Echocardiography Is an Independent Predictor of Cardiovascular Events and Mortality in the General Population. *J Am Heart Assoc.* 2018;7(6).
7. Modin D, Biering-Sorensen SR, Mogelvang R, Landler N, Jensen JS, Biering-Sorensen T. Prognostic Value of Echocardiography in Hypertensive Versus Nonhypertensive Participants From the General Population. *Hypertension.* 2018;26:26.
8. Shah AM, Claggett B, Loehr LR, et al. Heart Failure Stages Among Older Adults in the Community: The Atherosclerosis Risk in Communities Study. *Circulation.* 2017;135(3):224-240.
